# Supplementary material for: A novel organotypic cortical slice culture model for traumatic brain injury: molecular changes induced by injury and mesenchymal stromal cell secretome treatment
Source: PubMed Central journal article supplement (PMC10390737; doi:10.3389/fncel.2023.1217987), 2023-07-18
Supplement: Image_1.pdf [file Image_1.pdf]

**Figure S1: Schematic drawing of the process used to obtain cortical brain slices.**

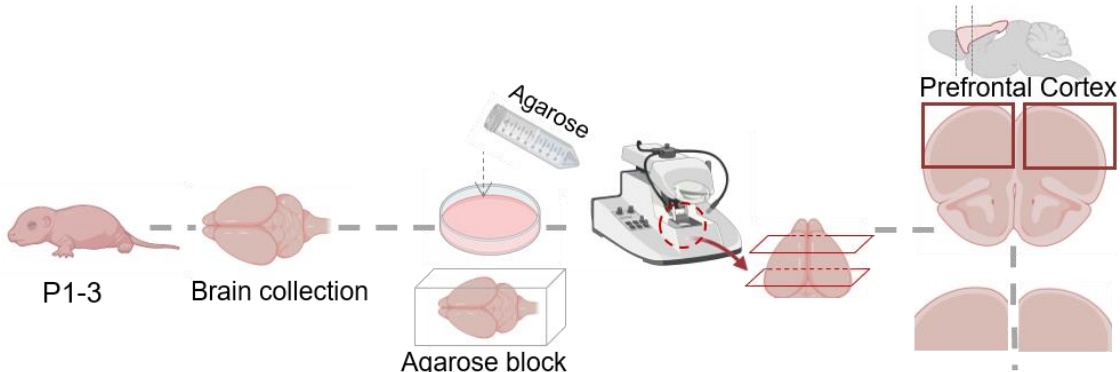

Image created with BioRender.com

**Figure S2: Systems biology analysis of altered proteins which revealed several statistically significant molecular functions and biological process pathways**

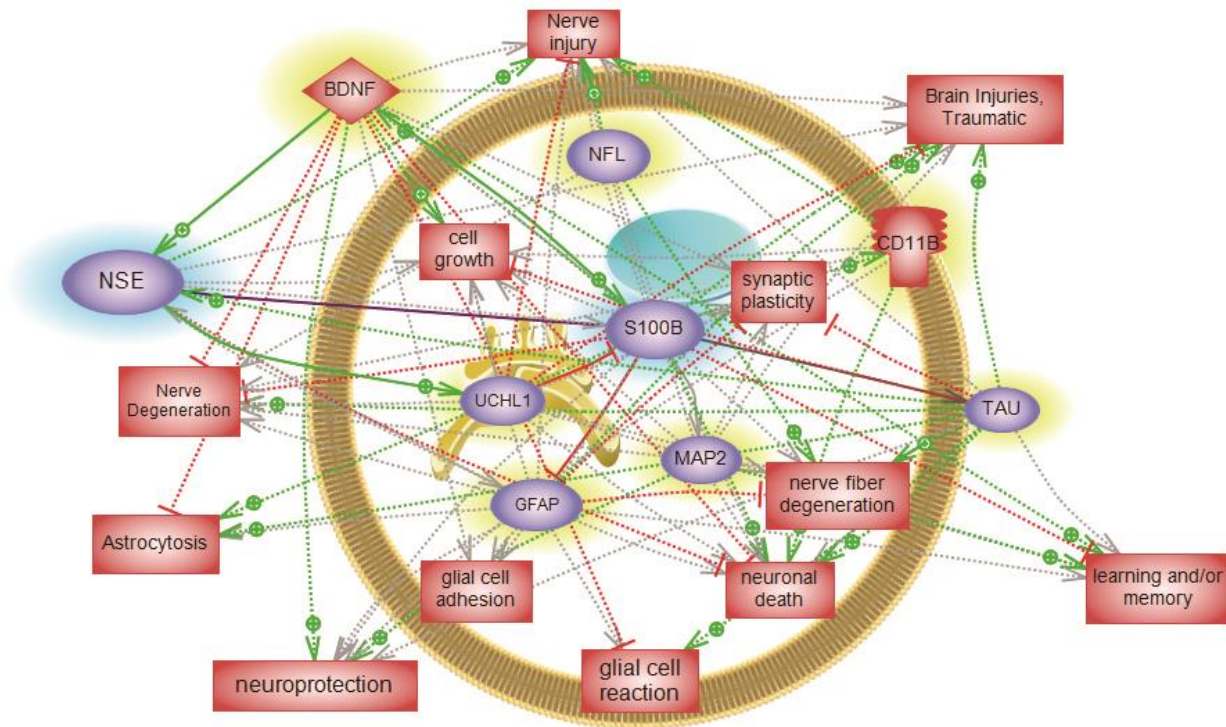

| Pathway                    | p-value |
|----------------------------|---------|
| Neurodegenerative Diseases | p<0.001 |
| Nerve injury               | p<0.001 |
| Nerve fiber degeneration   | p<0.001 |
| Traumatic Injuries         | p<0.001 |
| Neuronal death             | p<0.001 |
| Learning and/or memory     | p<0.001 |
| Neuroprotection            | p<0.001 |
| Synaptic plasticity        | p<0.001 |
| Glial cell reaction        | p<0.001 |
| Astrocytosis               | p<0.001 |
| Cell growth                | p<0.001 |
| Glial cell adhesion        | p<0.001 |

Picture shows the interaction map of altered protein and their corresponding relation to neural injury development; these statistically significant proteins include UCH-L1, GFAP, tau, Map2 (yellow hallow) as well as the two established TBI proteins S100B, and Neuron Specific Enolase (NSE) (Blue hallow).

**Figure S3: Morphometric analysis of neuronal network after MSC-secretome treatment**

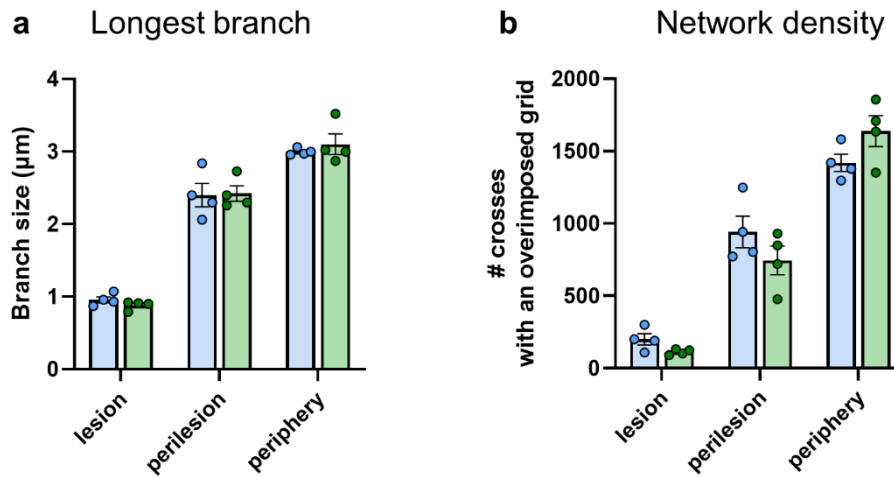

Quantification of the size of the longest branch (a) and the network density (b) of MAP-2 immunostained slices after MSC-secretome treatment. Data are mean  $\pm$  SEM.

**Figure S4: Microglial shape descriptors after MSC-secretome treatment.**

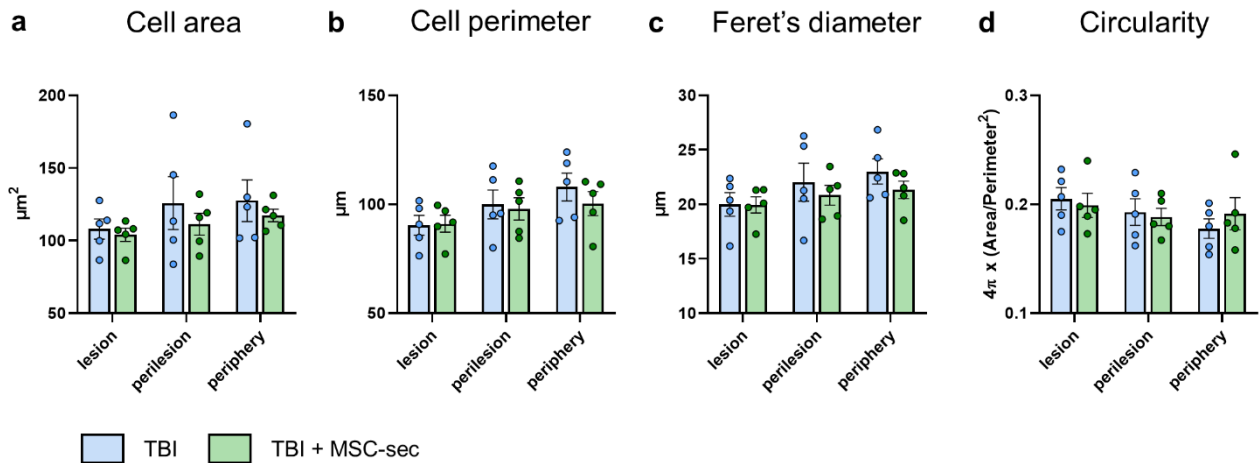

Quantification of morphometric microglia cell parameters after MSC-secretome treatment: mean cell area (a), perimeter (b), Feret's diameter (c) and circularity (d). Data are mean  $\pm$  SEM.
